# Supplementary material for: Mammary ductal morphogenesis requires paracrine activation of stromal EGFR via ADAM17-dependent shedding of epithelial amphiregulin
Source: Oxford University Press journal article supplement (doi:10.1242/dev.01966), 2005-08-03
Supplement: dev01966tables1.pdf [file dev01966tables1.pdf]

**Table S1. Microarray expression data for 5-week-old mammary glands**

TEBs (Cy5) versus stroma (Cy3)

| Gene           | UniGene   | Array 1 |        | Array 2 |        | Array 3 |        | Array 4 |        | Array 5 |        | Array 6 |        |
|----------------|-----------|---------|--------|---------|--------|---------|--------|---------|--------|---------|--------|---------|--------|
|                |           | M       | A      | M       | A      | M       | A      | M       | A      | M       | A      | M       | A      |
| <i>Adam9</i>   | Mm.28908  | -1.283  | 10.517 | -1.118  | 9.57   | -0.784  | 9.825  | -0.96   | 8.69   | -1.349  | 10.368 | -0.834  | 10.502 |
| <i>Adam10</i>  | Mm.3037   | 0.186   | 10.466 | -0.055  | 9.95   | 0.545   | 10.582 | 0.814   | 11.286 | 0.373   | 11.083 | 0.928   | 11.645 |
| <i>Adam10</i>  | Mm.3037   | 0.542   | 9.233  | 0.254   | 8.897  | 0.6     | 8.807  | 1.195   | 9.245  | 0.381   | 8.615  | 0.973   | 9.532  |
| <i>Adam12</i>  | Mm.41158  | -0.033  | 9.753  | -0.193  | 9.117  | -0.769  | 10.196 | 0.234   | 9.55   | -0.62   | 8.899  | 0.282   | 9.992  |
| <i>Adam15</i>  | Mm.19830  | 0.473   | 10.47  | 0.296   | 9.615  | -0.025  | 9.923  | -0.058  | 9.745  | -0.202  | 10.321 | 0.164   | 10.581 |
| <i>Adam17</i>  | Mm.27681  | -0.325  | 10.212 | -0.52   | 10.127 | 0.063   | 10.145 | 0.03    | 10.696 | -0.233  | 10.552 | 0.156   | 11.098 |
| <i>Adam19</i>  | Mm.89940  | 0.445   | 9.977  | 0.532   | 9.557  | 0.331   | 9.703  | 0.374   | 10.339 | 0.369   | 10.439 | 0.578   | 10.396 |
| <i>Adam33</i>  | Mm.44960  | -0.465  | 8.565  | -0.146  | 8.664  | -0.33   | 8.638  | -0.569  | 7.992  | -0.516  | 8.617  | -1.039  | 9.115  |
| <i>Areg</i>    | Mm.8039   | 3.716   | 10.043 | 2.891   | 9.038  | 3.717   | 10.393 | 3.482   | 9.297  | 4.284   | 9.846  | 3.744   | 9.572  |
| <i>Btc</i>     | Mm.2024   | -0.01   | 8.571  | -0.114  | 8.147  | 0.372   | 7.879  | 0.753   | 8.842  | 0.717   | 8.31   | 0.175   | 8.422  |
| <i>Hbegf</i>   | Mm.4661   | 0.272   | 7.864  | 0.048   | 8.048  | 0.153   | 7.619  | 0.153   | 7.64   | 0.073   | 7.846  | 0.067   | 8.226  |
| <i>Egf</i>     | Mm.1341   | -0.053  | 8.211  | -0.001  | 7.913  | -0.186  | 7.658  | 0.133   | 7.462  | -0.151  | 7.803  | 0.054   | 7.993  |
| <i>Epgn</i>    | Mm.53278  | -0.017  | 7.947  | 0.058   | 8.214  | 0.108   | 7.46   | 0.016   | 7.558  | 0.353   | 7.729  | 0.572   | 7.873  |
| <i>Ereg</i>    | Mm.4791   | 0.004   | 7.998  | 0.454   | 7.61   | -0.043  | 7.694  | 0.257   | 7.53   | -0.11   | 7.631  | 0.131   | 7.923  |
| <i>Tgfa</i>    | Mm.275755 | 0.915   | 8.502  | 0.303   | 8.441  | 0.7     | 8.112  | 0.731   | 8.154  | 1.199   | 8.228  | 1.068   | 8.558  |
| <i>Nrg3</i>    | Mm.6213   | 0.043   | 7.992  | 0.115   | 8.154  | 0.032   | 7.486  | 0.17    | 7.343  | 0.144   | 7.875  | 0.122   | 7.927  |
| <i>Nrg4</i>    | Mm.230205 | -1.662  | 10.47  | -1.611  | 11.237 | -1.982  | 10.233 | -2.122  | 10.477 | -1.467  | 10.61  | -1.869  | 11.311 |
| <i>Tnf</i>     | Mm.1293   | 0.204   | 7.996  | 0.266   | 8.565  | 0.009   | 7.955  | 0.537   | 7.842  | 0.06    | 7.712  | 0.275   | 8.355  |
| <i>Egfr</i>    | Mm.8534   | 0.087   | 10.45  | 0.453   | 9.604  | -0.238  | 9.801  | 0.576   | 10.912 | -0.614  | 11.081 | 0.135   | 11.075 |
| <i>ErbB4</i>   | Mm.57113  | -0.134  | 7.858  | 0.074   | 8.284  | 0.035   | 7.996  | 0.206   | 7.774  | 0.025   | 8.022  | -0.083  | 8.147  |
| <i>Timp1</i>   | Mm.8245   | 2.785   | 10.605 | 2.364   | 9.699  | 2.405   | 10.111 | 3.171   | 10.749 | 2.557   | 10.284 | 3.369   | 10.468 |
| <i>Timp2</i>   | Mm.206505 | 0.107   | 11.243 | 0.358   | 10.219 | -0.189  | 10.122 | 0.089   | 10.34  | -0.266  | 7.328  | -0.295  | 11.475 |
| <i>Timp3</i>   | Mm.4871   | -1.562  | 11.032 | -1.902  | 10.891 | -1.349  | 10.809 | -1.278  | 11.467 | -1.785  | 11.295 | -1.586  | 11.434 |
| <i>Timp4</i>   | Mm.36851  | -0.643  | 8.991  | -0.659  | 8.369  | -0.696  | 8.387  | -1.228  | 8.509  | -1.156  | 8.812  | -0.87   | 9.024  |
| <i>Krt1-14</i> | Mm.6974   | 0.971   | 9.136  | 1.779   | 9.602  | 1.299   | 9.332  | 1.596   | 9.01   | 1.663   | 9.454  | 1.705   | 9.79   |
| <i>Krt1-18</i> | Mm.22479  | 4.971   | 12.214 | 4.99    | 10.967 | 4.7     | 11.203 | 5.466   | 11.02  | 5.408   | 11.279 | 5.623   | 11.625 |
| <i>Ucp1</i>    | Mm.4177   | -3.33   | 14.116 | -3.565  | 14.113 | -3.911  | 13.608 | -3.515  | 13.868 | -2.964  | 13.38  | -3.976  | 13.683 |
| <i>Hprt1</i>   | Mm.18675  | 0.236   | 11.031 | -0.235  | 9.951  | -0.045  | 10.15  | 0.148   | 10.307 | 0.058   | 10.086 | -0.192  | 11.447 |

## Ducts (Cy5) versus stroma (Cy3)

|                |           | Array 1 |        | Array 2 |        | Array 3 |        | Array 4 |        | Array 5 |        | Array 6 |        |
|----------------|-----------|---------|--------|---------|--------|---------|--------|---------|--------|---------|--------|---------|--------|
| Gene           | UniGene   | M       | A      | M       | A      | M       | A      | M       | A      | M       | A      | M       | A      |
| <i>Adam9</i>   | Mm.28908  | -0.118  | 10.535 | 0.006   | 10.745 | -0.051  | 10.596 | -0.022  | 12.726 | -0.076  | 11.437 | -0.365  | 12.075 |
| <i>Adam10</i>  | Mm.3037   | 1.064   | 10.913 | 1.402   | 11.764 | 1.271   | 11.567 | 0.846   | 11.485 | 1.255   | 11.708 | 1.196   | 11.04  |
| <i>Adam10</i>  | Mm.3037   | 0.622   | 9.449  | 0.635   | 9.451  | 0.3     | 9.041  | 0.318   | 10.307 | 0.478   | 9.436  | 0.898   | 9.719  |
| <i>Adam12</i>  | Mm.41158  | -0.498  | 9.139  | -0.019  | 9.284  | -0.924  | 9.648  | -0.654  | 9.157  | -0.562  | 9.854  | -0.23   | 8.817  |
| <i>Adam15</i>  | Mm.19830  | 0.108   | 9.964  | 0.058   | 9.31   | 0.006   | 10.315 | 0.119   | 10.584 | 0.151   | 10.889 | 0.087   | 9.689  |
| <i>Adam17</i>  | Mm.27681  | 0.109   | 11.058 | -0.174  | 10.986 | 0.082   | 10.836 | 0.193   | 11.336 | 0.267   | 10.991 | -0.245  | 10.393 |
| <i>Adam19</i>  | Mm.89940  | 0.253   | 9.849  | 0.273   | 10.143 | -0.049  | 10.177 | 0.029   | 10.939 | 0.035   | 10.248 | -0.019  | 10.171 |
| <i>Adam33</i>  | Mm.44960  | 0.124   | 8.9    | -0.094  | 9.01   | -0.058  | 9.237  | 0.027   | 8.916  | 0.047   | 9.129  | 0.032   | 8.729  |
| <i>Areg</i>    | Mm.8039   | 3.756   | 10.43  | 3.074   | 9.393  | 3.828   | 10.193 | 1.375   | 8.325  | 3.589   | 9.584  | 3.41    | 9.461  |
| <i>Btc</i>     | Mm.2024   | 0.175   | 8.39   | 0.096   | 8.358  | 0.613   | 8.355  | 0.391   | 8.802  | 0.314   | 8.196  | 0.853   | 8.747  |
| <i>Hbegf</i>   | Mm.4661   | -0.055  | 8.121  | 0.103   | 8.303  | -0.068  | 7.88   | 0.044   | 8.151  | 0.123   | 7.95   | 0.123   | 7.953  |
| <i>Egf</i>     | Mm.1341   | -0.01   | 8.234  | 0.059   | 8.178  | -0.267  | 7.662  | -0.149  | 8.926  | 0.176   | 7.743  | -0.166  | 7.994  |
| <i>Epgn</i>    | Mm.53278  | -0.031  | 8.2    | -0.059  | 9.626  | -0.063  | 7.59   | -0.055  | 7.982  | 0.072   | 7.677  | 0.058   | 7.934  |
| <i>Ereg</i>    | Mm.4791   | 0.019   | 8.092  | 0.342   | 7.981  | 0.026   | 7.807  | -0.12   | 7.594  | 0.018   | 7.675  | 0.107   | 7.7    |
| <i>Tgfa</i>    | Mm.275755 | 0.085   | 8.283  | 0.184   | 8.49   | 0.67    | 8.177  | 0.63    | 8.46   | 0.03    | 7.868  | 0.129   | 8.164  |
| <i>Nrg3</i>    | Mm.6213   | 0.044   | 8.277  | 0.04    | 8.111  | -0.042  | 7.459  | -0.022  | 8      | -0.025  | 7.66   | 0.052   | 7.78   |
| <i>Nrg4</i>    | Mm.230205 | -0.873  | 11.428 | -0.807  | 12.312 | -0.72   | 11.371 | -0.656  | 11.753 | -0.648  | 12.023 | -1.03   | 11.369 |
| <i>Tnf</i>     | Mm.1293   | 0.279   | 8.346  | -0.009  | 8.154  | -0.006  | 7.821  | -0.221  | 8.169  | -0.016  | 7.901  | -0.052  | 7.974  |
| <i>Egfr</i>    | Mm.8534   | 0.429   | 10.452 | 1.012   | 10.925 | -0.004  | 11.183 | 0.204   | 11.419 | 0.232   | 11.155 | 0.088   | 11.703 |
| <i>ErbB4</i>   | Mm.57113  | 0.447   | 8.213  | 0.387   | 8.232  | 0.918   | 7.837  | 0.104   | 8.356  | 0.026   | 7.823  | 0.111   | 8.101  |
| <i>Timp1</i>   | Mm.8245   | 0.414   | 9.35   | 0.963   | 9.204  | 0.119   | 9.398  | -0.389  | 9.96   | 1.079   | 9.865  | 0.897   | 10.028 |
| <i>Timp2</i>   | Mm.206505 | 0.226   | 11.055 | 0.586   | 10.944 | -0.226  | 10.609 | 0.155   | 12.86  | -0.115  | 12.236 | 0.03    | 12.087 |
| <i>Timp3</i>   | Mm.4871   | -0.036  | 11.727 | 0.113   | 12.54  | 0.384   | 12.344 | 0.279   | 12.071 | 0.108   | 12.357 | -0.13   | 11.883 |
| <i>Timp4</i>   | Mm.36851  | -0.548  | 8.764  | -0.362  | 8.238  | -0.629  | 9.403  | -0.941  | 9.126  | -0.738  | 9.461  | -0.546  | 8.713  |
| <i>Krt1-14</i> | Mm.6974   | 2.188   | 10.321 | 2.875   | 11.096 | 2.121   | 10.164 | 3.416   | 10.785 | 3.166   | 10.628 | 2.947   | 10.438 |
| <i>Krt1-18</i> | Mm.22479  | 4.464   | 11.632 | 4.146   | 10.633 | 4.885   | 11.437 | 5.576   | 12.826 | 5.461   | 11.827 | 5.356   | 12.285 |
| <i>Ucp1</i>    | Mm.4177   | -1.684  | 15.155 | -2.38   | 14.821 | -1.558  | 14.655 | -0.833  | 15.827 | -1.002  | 15.548 | -3.454  | 13.643 |
| <i>Hprt1</i>   | Mm.18675  | 0.016   | 10.927 | 0.133   | 10.2   | -0.02   | 10.845 | 0.178   | 12.706 | 0.039   | 12.037 | 0.02    | 11.804 |

M =  $\log_2(\text{Cy5})/\log_2(\text{Cy3})$ ; A =  $0.5[\log_2(\text{Cy5}) + \log_2(\text{Cy3})]$
