# Supplementary material for: Mammary ductal morphogenesis requires paracrine activation of stromal EGFR via ADAM17-dependent shedding of epithelial amphiregulin
Source: Oxford University Press journal article supplement (doi:10.1242/dev.01966), 2005-08-03
Supplement: dev01966tables2.pdf [file dev01966tables2.pdf]

**Table S2. Relative expression of potential interacting genes in 5-week-old mammary glands**

| Gene           | TEBs versus stroma         |                   |          | Ducts versus stroma        |                   |          |
|----------------|----------------------------|-------------------|----------|----------------------------|-------------------|----------|
|                | Overall signal (mean±s.d.) | Ratio (mean±s.d.) | <i>P</i> | Overall signal (mean±s.d.) | Ratio (mean±s.d.) | <i>P</i> |
| <i>Adam9</i>   | 1053±428                   | 0.49±0.08         | <0.0005  | 3102±2099                  | 0.93±0.08         | NS       |
| <i>Adam10</i>  | 1968±812                   | 1.42±0.36         | 0.052    | 2793±642                   | 2.27±0.29         | <0.0005  |
| <i>Adam10</i>  | 544±129                    | 1.62±0.42         | 0.016    | 788±255                    | 1.47±0.24         | 0.010    |
| <i>Adam12</i>  | 806±267                    | 0.91±0.26         | NS       | 656±175                    | 0.73±0.16         | 0.041    |
| <i>Adam15</i>  | 1140±311                   | 1.09±0.19         | NS       | 1194±470                   | 1.06±0.11         | NS       |
| <i>Adam17</i>  | 1465±419                   | 0.92±0.16         | NS       | 1992±405                   | 1.04±0.14         | NS       |
| <i>Adam19</i>  | 1104±276                   | 1.35±1.07         | <0.0005  | 1257±360                   | 1.07±0.11         | NS       |
| <i>Adam33</i>  | 397±95                     | 0.70±1.23         | 0.020    | 511±64                     | 1.01±0.06         | NS       |
| <i>Areg</i>    | 873±300                    | 12.96±3.92        | <0.0001  | 836±380                    | 10.23±4.28        | 0.003    |
| <i>Btc</i>     | 336±78                     | 1.28±0.33         | NS       | 360±62                     | 1.35±0.28         | 0.045    |
| <i>Hbegf</i>   | 214±28                     | 1.09±0.06         | 0.028    | 226±31                     | 1.03±0.06         | NS       |
| <i>Egf</i>     | 237±39                     | 0.98±0.08         | NS       | 268 ±30                    | 0.96±0.11         | NS       |
| <i>Epgn</i>    | 232±42                     | 1.15±0.20         | NS       | 291±103                    | 0.99±0.04         | NS       |
| <i>Ereg</i>    | 226±44                     | 1.09±0.17         | NS       | 330±47                     | 1.05±0.12         | NS       |
| <i>Tgfa</i>    | 325±43                     | 1.80±0.38         | 0.004    | 306±47                     | 1.24±0.26         | NS       |
| <i>Nrg3</i>    | 227±47                     | 1.08±0.04         | 0.015    | 240±50                     | 1.01±0.03         | NS       |
| <i>Nrg4</i>    | 1761±568                   | 0.29±0.05         | 0.0001   | 3458±995                   | 0.58±0.06         | <0.0005  |
| <i>Tnf</i>     | 275±65                     | 1.18±0.16         | 0.055    | 269±37                     | 1.00±0.12         | NS       |
| <i>Egfr</i>    | 1553±623                   | 1.09±0.31         | NS       | 2337±662                   | 1.29±0.37         | NS       |
| <i>ErbB4</i>   | 260±34                     | 1.02±0.09         | NS       | 276±41                     | 1.29±0.33         | NS       |
| <i>Timp1</i>   | 1313±321                   | 7.09±2.13         | 0.0001   | 815±198                    | 1.52±0.54         | NS       |
| <i>Timp2</i>   | 1506±974                   | 0.99±0.18         | NS       | 3711±2266                  | 1.10±0.23         | NS       |
| <i>Timp3</i>   | 2316±448                   | 0.34±0.06         | 0.0001   | 4645±983                   | 1.09±0.15         | NS       |
| <i>Timp4</i>   | 418±86                     | 0.55±0.09         | 0.001    | 516±158                    | 0.65±0.09         | 0.003    |
| <i>Krt1-14</i> | 681±137                    | 2.88±0.56         | <0.0005  | 1558±379                   | 7.27±2.47         | <0.0005  |
| <i>Krt1-18</i> | 2805±1038                  | 37.51±9.07        | <0.0001  | 3903±1985                  | 33.67±12.36       | <0.0005  |
| <i>Ucp1</i>    | 14454±2890                 | 0.09±0.02         | <0.0001  | 35010±16238                | 0.33±0.18         | 0.02     |
| <i>Hprt1</i>   | 1561±723                   | 1.00±0.13         | NS       | 3237±2038                  | 1.04±0.06         | NS       |

Values represent normalized arithmetic means and standard deviations obtained after converting the mean overall signal intensities  $A = 0.5[\log_2(\text{Cy}5) + \log_2(\text{Cy}3)]$  and expression ratios  $M = \log_2(\text{Cy}5/\text{Cy}3)$  for each of six independent arrays to linear values. Ratios greater than 1 represent relative enrichment in the epithelial compartment, whereas ratios less than 1 indicate stromal enrichment. *P* values for rejecting the hypothesis that the mean expression ratio = 1 were corrected to control for the false discovery rate over the entire array (Benjamini and Hochberg, 1995). Mean overall signals of less than 256 ( $A=8$ ) were difficult to distinguish from background. *Krt1-14* (keratin 14, a myoepithelial cell marker), *Krt1-18* (keratin 18, a luminal epithelial cell marker), *Ucp1* (uncoupling protein 1, an adipocyte marker) and *Hprt1* (hypoxanthine guanine phosphoribosyl transferase 1, a housekeeping gene) are included as controls. NS, not significant.
